# Supplementary material for: Targeting the epigenetics of the DNA damage response in breast cancer
Source: PubMed Central journal article supplement (PMC4855664; doi:10.1038/cddis.2016.85), 2016-04-07
Supplement: cddis201685x1.pdf [file cddis201685x1.pdf]

**a**

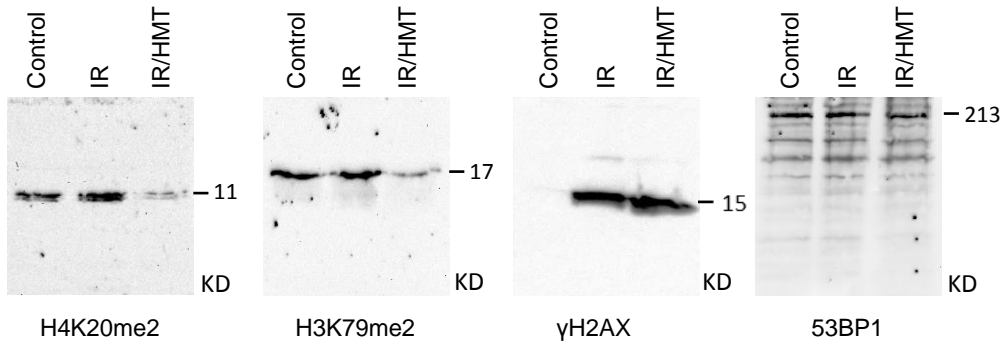

**b**

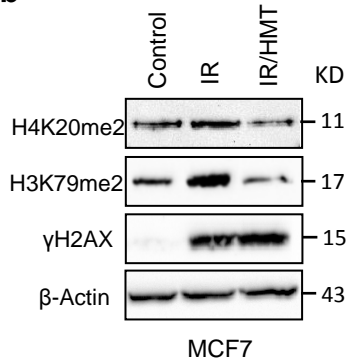

**Supplementary Figure 1.** (a) Uncropped western blots corresponding to Figure 2a to show the specificity of the employed antibodies. (b) The total levels of H3K79me2, H4K20me2, and γH2AX were examined in MCF7 cells using western blot analysis following the indicated treatments. At 1 h after irradiation (120 Gy), the cells were collected and analyzed.
